# Supplementary material for: Sperm Cohort-Specific Zinc Signature Acquisition and Capacitation-Induced Zinc Flux Regulate Sperm-Oviduct and Sperm-Zona Pellucida Interactions
Source: Int J Mol Sci. 2020 Mar 19;21(6):2121. doi: 10.3390/ijms21062121 (PMC7139966; doi:10.3390/ijms21062121)
Supplement: Supplementary file 1 [file ijms-21-02121-s001.pdf]

Supplementary

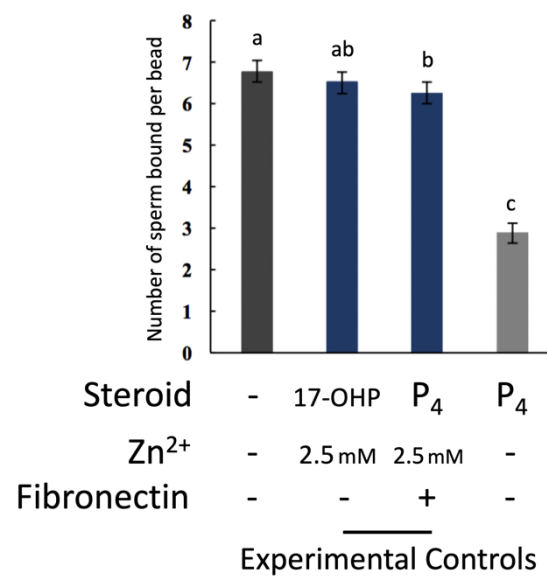

**Figure S1.** Controls for sperm release from glycans of the oviductal sperm reservoir. Values with different superscripts (a,b,c) indicate significant difference by treatment ( $p$ -value < 0.05).

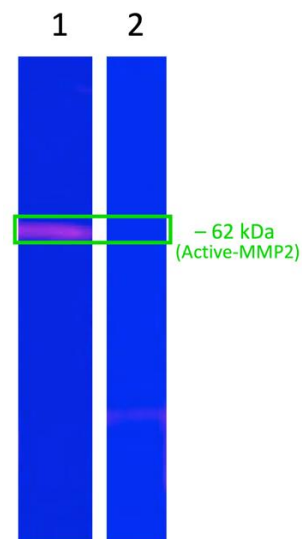

**Figure S2.** Zinc ions block the activity of the active form of human sperm-borne ZP proteinase MMP2. Clear band in the zymogram indicates enzymatic digestion of gelatin. Lane 1: vehicle block, lane 2: 1.5 mM ZnCl<sub>2</sub> block.

**Table S1.** Zinc inhibits P<sub>4</sub>-induced sperm release from oviductal glycans.

| <b>Treatment</b>                                       | <b>Number of Sperm Bound</b> |
|--------------------------------------------------------|------------------------------|
| Before Steroids                                        | 6.79 ± 1.29% <sup>A</sup>    |
| 15 µM Zn <sup>2+</sup> + P <sub>4</sub>                | 4.32 ± 1.21% <sup>D</sup>    |
| 0.5 mM Zn <sup>2+</sup> + P <sub>4</sub>               | 4.91 ± 1.30% <sup>C</sup>    |
| 1.5 mM Zn <sup>2+</sup> + P <sub>4</sub>               | 5.95 ± 1.58% <sup>B</sup>    |
| 2.5 mM Zn <sup>2+</sup> + P <sub>4</sub>               | 6.61 ± 1.29% <sup>A</sup>    |
| 2.5 mM Zn <sup>2+</sup> + 17-OHP                       | 6.52 ± 1.29% <sup>AB</sup>   |
| 2.5 mM Zn <sup>2+</sup> + Fibronectin + P <sub>4</sub> | 6.25 ± 1.31% <sup>B</sup>    |
| 2.5 mM Ca <sup>2+</sup> + P <sub>4</sub>               | 3.84 ± 1.28% <sup>E</sup>    |
| P <sub>4</sub>                                         | 2.89 ± 1.18% <sup>F</sup>    |

Table data for manuscript figure 3, presented as mean ± SD. Values with different uppercase superscripts (A,B,C,D,E,F) indicate significant difference by treatment (*p*-value < 0.05). Three biological replicates (*n* = 3) were analyzed.
